# Supplementary material
Source: PubMed Central journal article supplement (PMC10527943)
Supplement: NIHMS1911103-supplement-1.pdf [file NIHMS1911103-supplement-1.pdf]

A

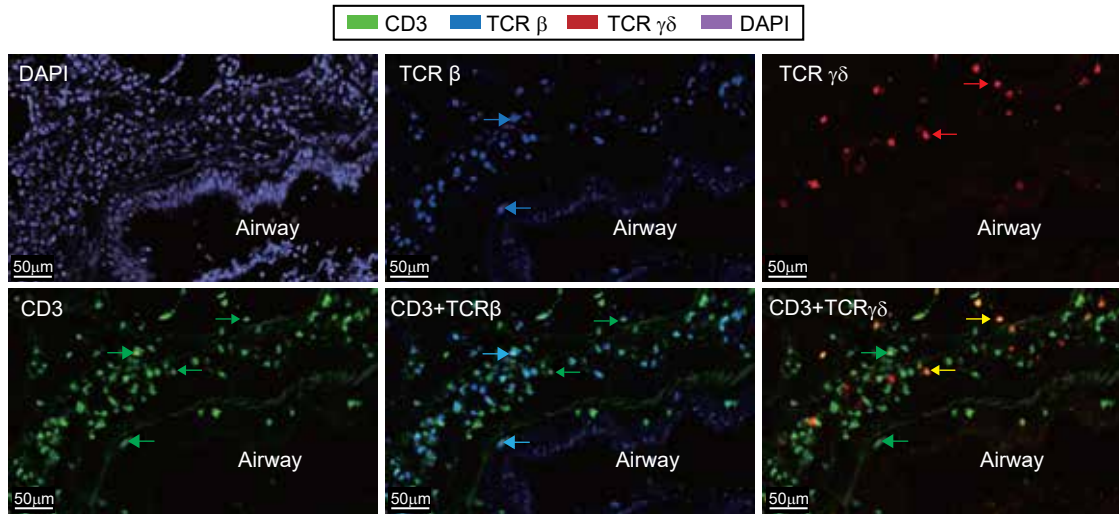

B

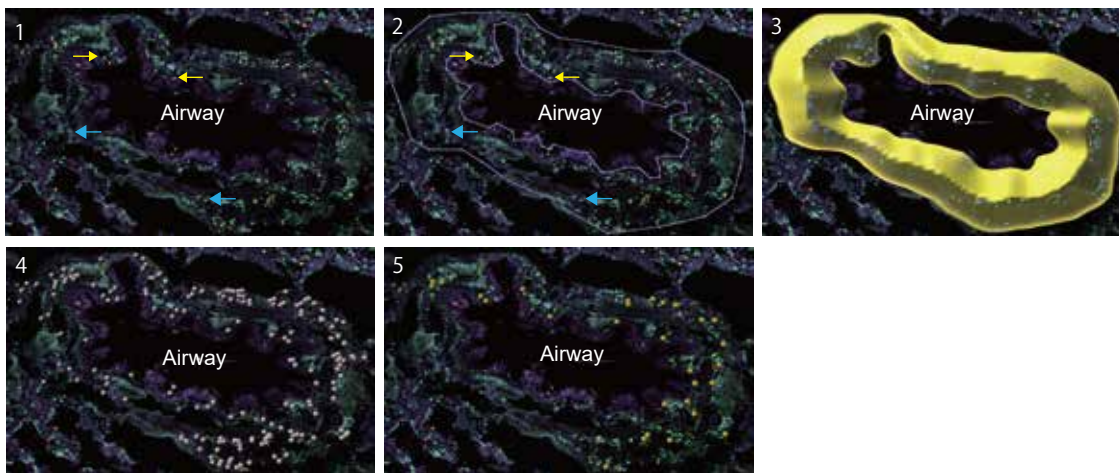

C

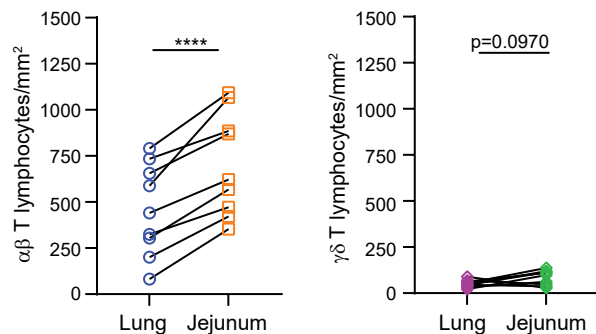

### Figure S1: Immunofluorescence imaging to define T cell populations in pediatric organ donors.

**Related to Figure 1.** (A) Representative images of the lung showing staining with single fluorescent labeled markers: DAPI to define cells and lung structures such as airways (top row left), TCRβ (top row middle), TCRγδ (top row right) and CD3 (lower row, left) and double staining combinations; CD3/TCRβ (bottom row middle), CD3 TCRγδ (bottom row right) shown. Arrows indicate cells staining positive for defined markers. (B) Representative images showing schematic for defining area and cellular composition within tissue. 1) Airway section stained with antibodies for DAPI, CD3, TCRβ, TCRγδ 2) Imaris software to define tissue adjacent to airway, 3) Imaris overlay to define total area within defined boundaries, 4) identification of all CD3<sup>+</sup> cells within defined area, 5) identification of CD3<sup>+</sup>/TCRγδ<sup>+</sup>/TCRβ<sup>-</sup> cells. Arrows indicate cells staining positive for defined markers. (C) Graphs showed paired analysis of αβ (left) and γδ (right) T cell density in the jejunum and lung for individual donors quantified by imaging; statistical testing done via paired T test, \*\*\*\* = p<0.0001.

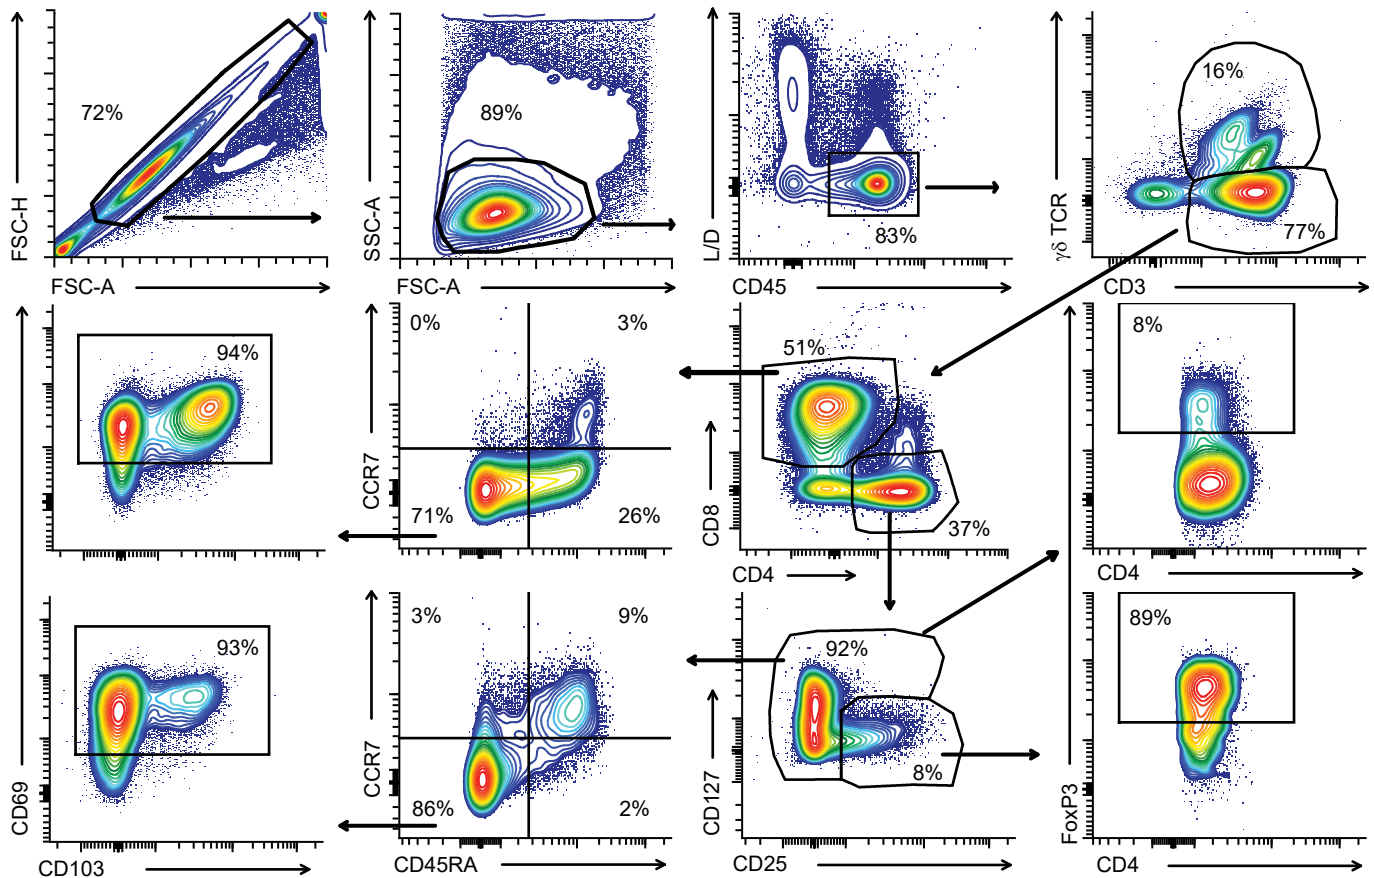

**Figure S2: Flow cytometry gating strategy.** Related to Figures 2, 3, 4, 5, 6. Representative flow cytometry plots showing gating strategy to identify T cells subsets within an intestine sample of 9-month old organ donor. Single cells were selected based on forward (FSC) and height (H) vs area (A), then lymphocytes were gated based on FSC vs side scatter (SSC) properties, followed by selection of CD45<sup>+</sup> live cells. T cells were gated based on expression of CD3;  $\gamma\delta$  T cells were gated based on expression of  $\gamma\delta$  TCR. CD3<sup>+</sup> $\gamma\delta$ - T cells were then gated based on expression of CD4 and CD8. CD4<sup>+</sup> T cells were subdivided based on expression of CD127 and CD25; CD25<sup>+</sup>/CD127<sup>-</sup> T cells were defined as conventional CD4 T cells (T<sub>CONV</sub>) and CD25<sup>+</sup>/CD127<sup>+</sup> T cells were defined as regulatory T cells (T<sub>REG</sub>) if they further expressed FoxP3 with gating set in conjunction with expression on T<sub>CONV</sub> cells. Memory subsets of CD4<sup>+</sup> T<sub>CONV</sub> and CD8<sup>+</sup> T cells were defined based on expression of CCR7 and CD45RA; Naïve – CCR7<sup>+</sup>/CD45RA<sup>+</sup>, central memory (T<sub>CM</sub>) – CCR7<sup>+</sup>/CD45RA<sup>-</sup>, effector memory (T<sub>EM</sub>) – CCR7<sup>-</sup>/CD45RA<sup>-</sup>, and effector memory RA<sup>+</sup> (T<sub>EMRA</sub>) – CCR7<sup>-</sup>/CD45RA<sup>+</sup>. CD4<sup>+</sup> and CD8<sup>+</sup> T<sub>EM</sub> were further gated based on expression of CD69 and CD103 to define markers consistent with phenotype of resident memory (T<sub>RM</sub>) T cells. Numbers refer to percent of total cells gated as fraction of previous gate.

A

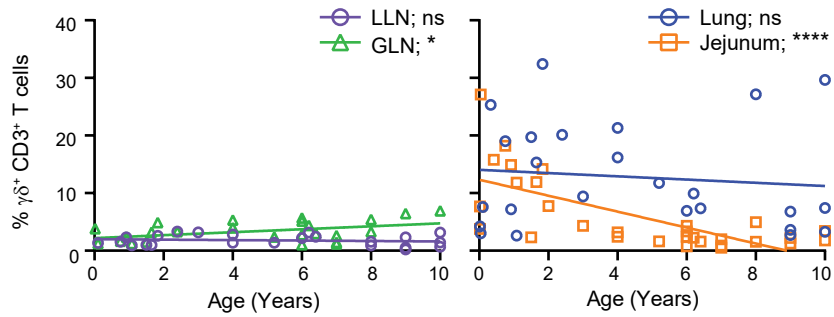

B

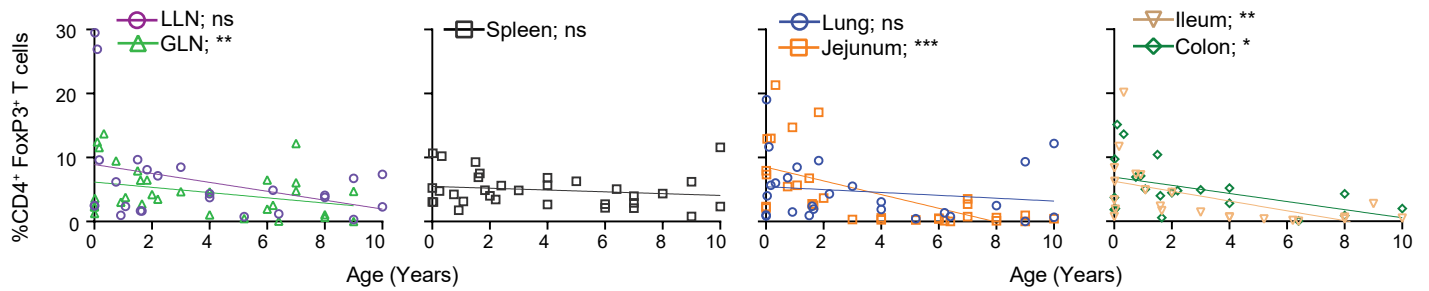

**Figure S3: Altered frequency of  $\gamma\delta$  T cells and Tregs in specific sites across childhood. Related to Figures 1.** (A) Graph depicts frequency of  $\gamma\delta$  T cells within lymphoid and mucosal tissues of individual donors of indicated ages compiled from flow cytometry results and gating strategy in Fig. S1. (B) Graph shows frequency of Tregs ( $CD4^+/CD127^-/CD25^+/FoxP3^+$ ) within indicated sites for each individual donors by age. Number of donors for each site: LLN, n=19-25; GLN, n=18-35, spleen = 32, lung = 23-26, jejunum = 23-31, ileum = 23, colon = 21. Statistical testing by Pearson's correlation. \* =  $p < 0.05$ , \*\* =  $p < 0.01$ , \*\*\* =  $p < 0.001$ , \*\*\*\* =  $p < 0.0001$ .

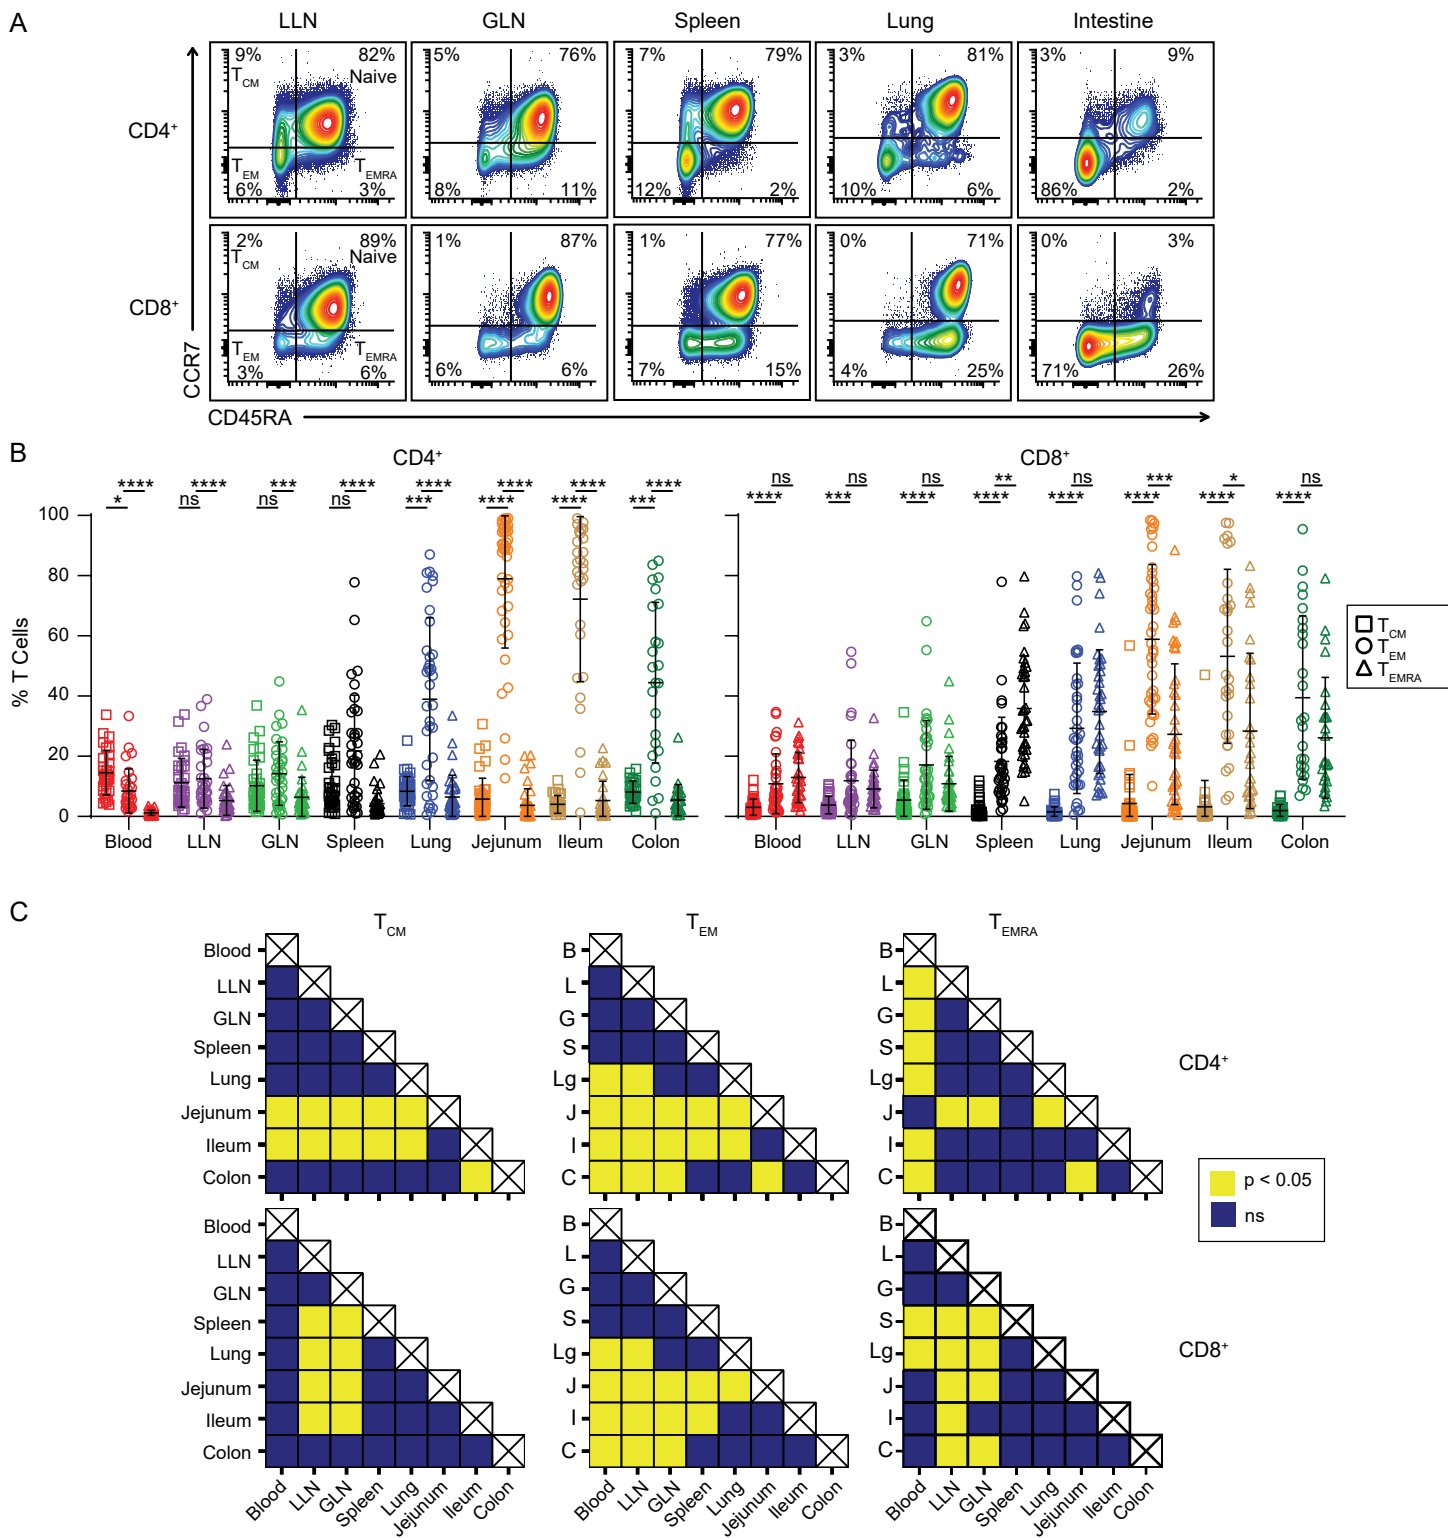

**Figure S4: T cell subset composition in pediatric tissues. Related to Figure 2.** (A) Representative flow cytometry plots showing CD45RA and CCR7 expression by CD4<sup>+</sup> (top) and CD8<sup>+</sup> (bottom) T cells isolated from indicated tissues of a 9-month organ donor. Abbreviations: Lung-associated lymph node (LLN), Gut-associated lymph node (GLN). T cell subsets are designated as Naïve (CCR7<sup>+</sup>CD45RA<sup>+</sup>), Central memory (T<sub>CM</sub>, CCR7<sup>+</sup>/CD45RA<sup>-</sup>), effector memory (T<sub>EM</sub>, CCR7<sup>-</sup>/CD45RA<sup>-</sup>), and terminal effector (T<sub>EMRA</sub>, CCR7<sup>-</sup>/CD45RA<sup>+</sup>). Numbers in each quadrant refer to % each subset comprises of total CD4<sup>+</sup> T<sub>CONV</sub> or CD8<sup>+</sup> T cells. (B) Graph shows frequency of memory T cell subsets (squares, T<sub>CM</sub>; circles, T<sub>EM</sub>; triangles, T<sub>EMRA</sub>) in each site for the following numbers of donors: blood, n= 31; LLN, n=33; GLN, n= 35; spleen, n= 36; lung, n= 36; jejunum, n= 41; ileum, n= 29; colon, n= 25. Statistical testing by Kruskal-wallis one-way anova with Dunn's multiple comparisons. \* = p<0.05, \*\* = p<0.01, \*\*\* = p<0.001, \*\*\*\* = p<0.0001. (C) Analysis of subset frequencies (T<sub>CM</sub>, T<sub>EM</sub>, T<sub>EMRA</sub>) as in (B) comparing between sites for CD4<sup>+</sup> (top) and CD8<sup>+</sup> (bottom) with yellow squares representing p<0.05. Statistical testing by Kruskal-Wallis one-way anova with Dunn's multiple comparisons.

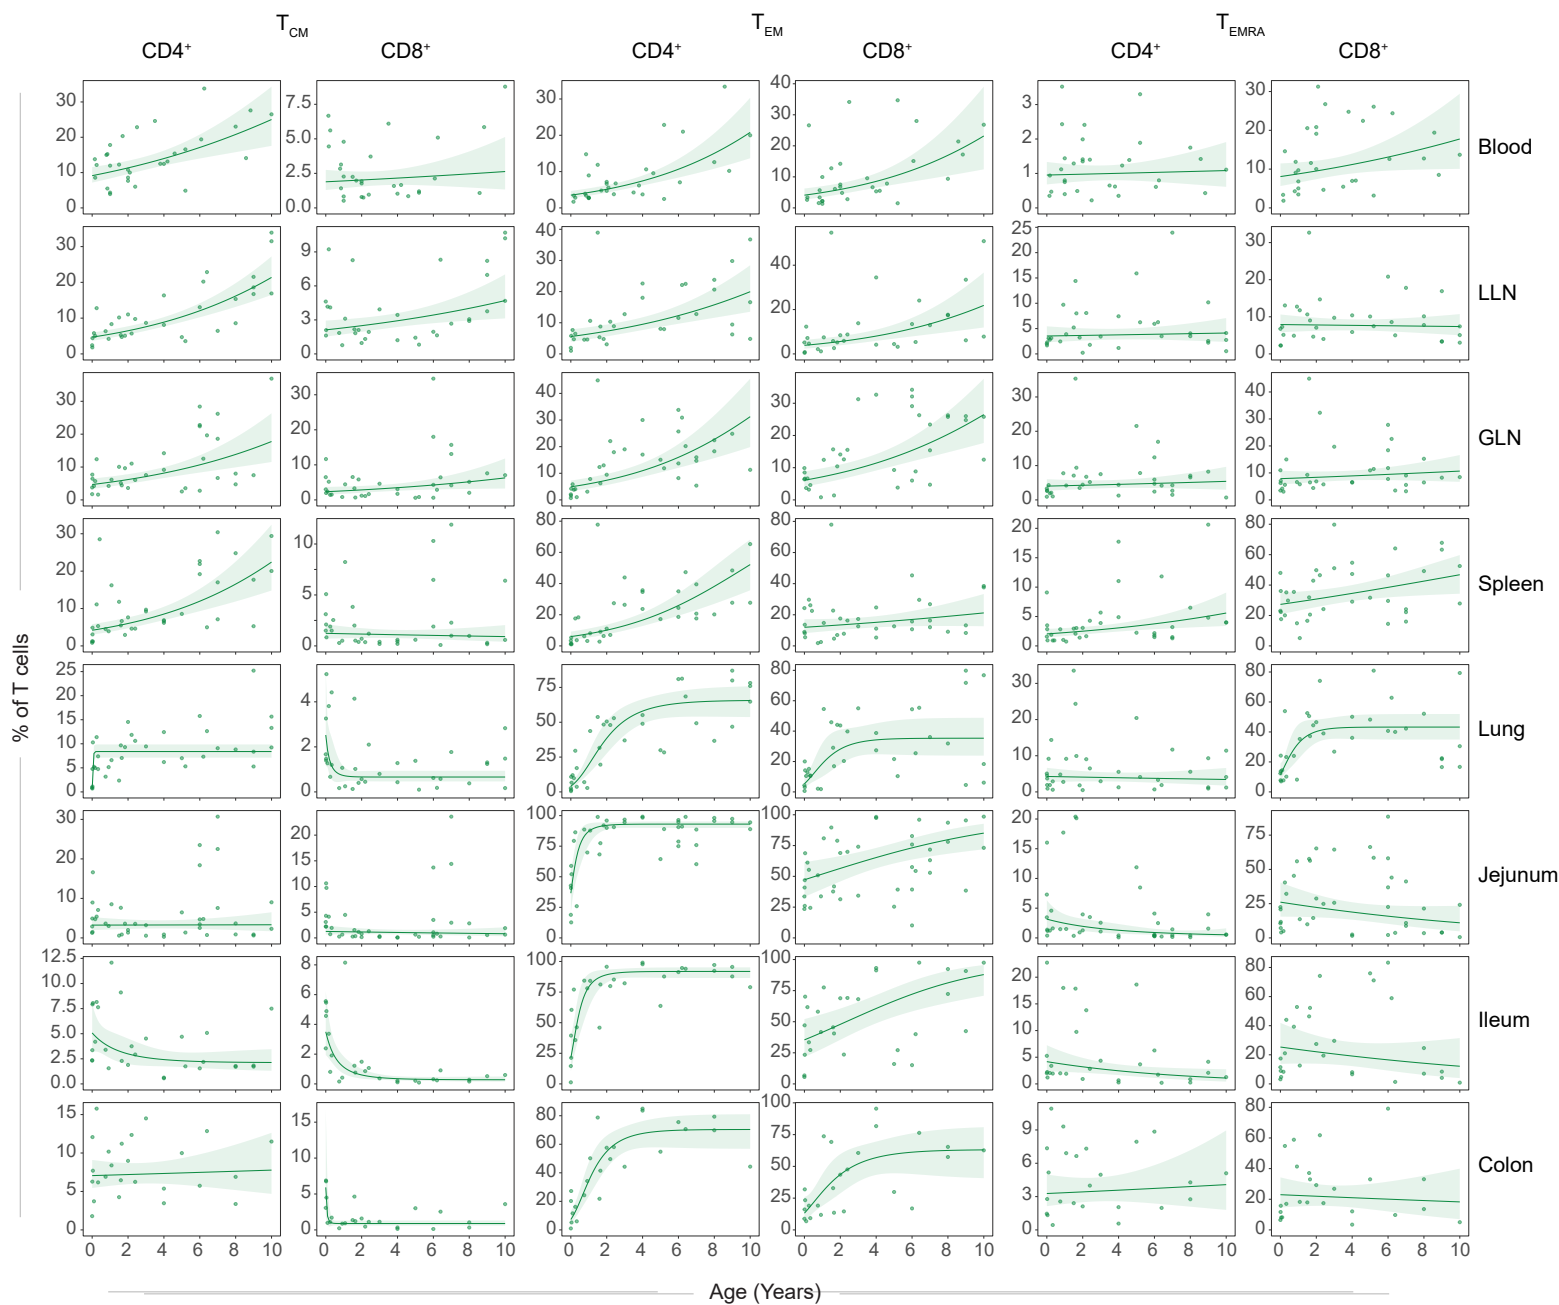

**Figure S5: Dynamics of memory subset frequencies over age for each site. Related to Figure 2.**

Graphs show frequencies of  $T_{CM}$  (left),  $T_{EM}$  (center), and  $T_{EMRA}$  (right) cells for  $CD4^+$  (left) and  $CD8^+$  (right) lineages within indicated sites over infancy and childhood. blood,  $n=31$ ; LLN,  $n=33$ ; GLN,  $n=35$ ; spleen,  $n=36$ ; lung,  $n=36$ ; jejunum,  $n=41$ ; ileum,  $n=29$ ; colon,  $n=25$ . Lines represent best fit model (logit-linear vs nonlinear; see methods) with shading depicting 95% confidence interval.

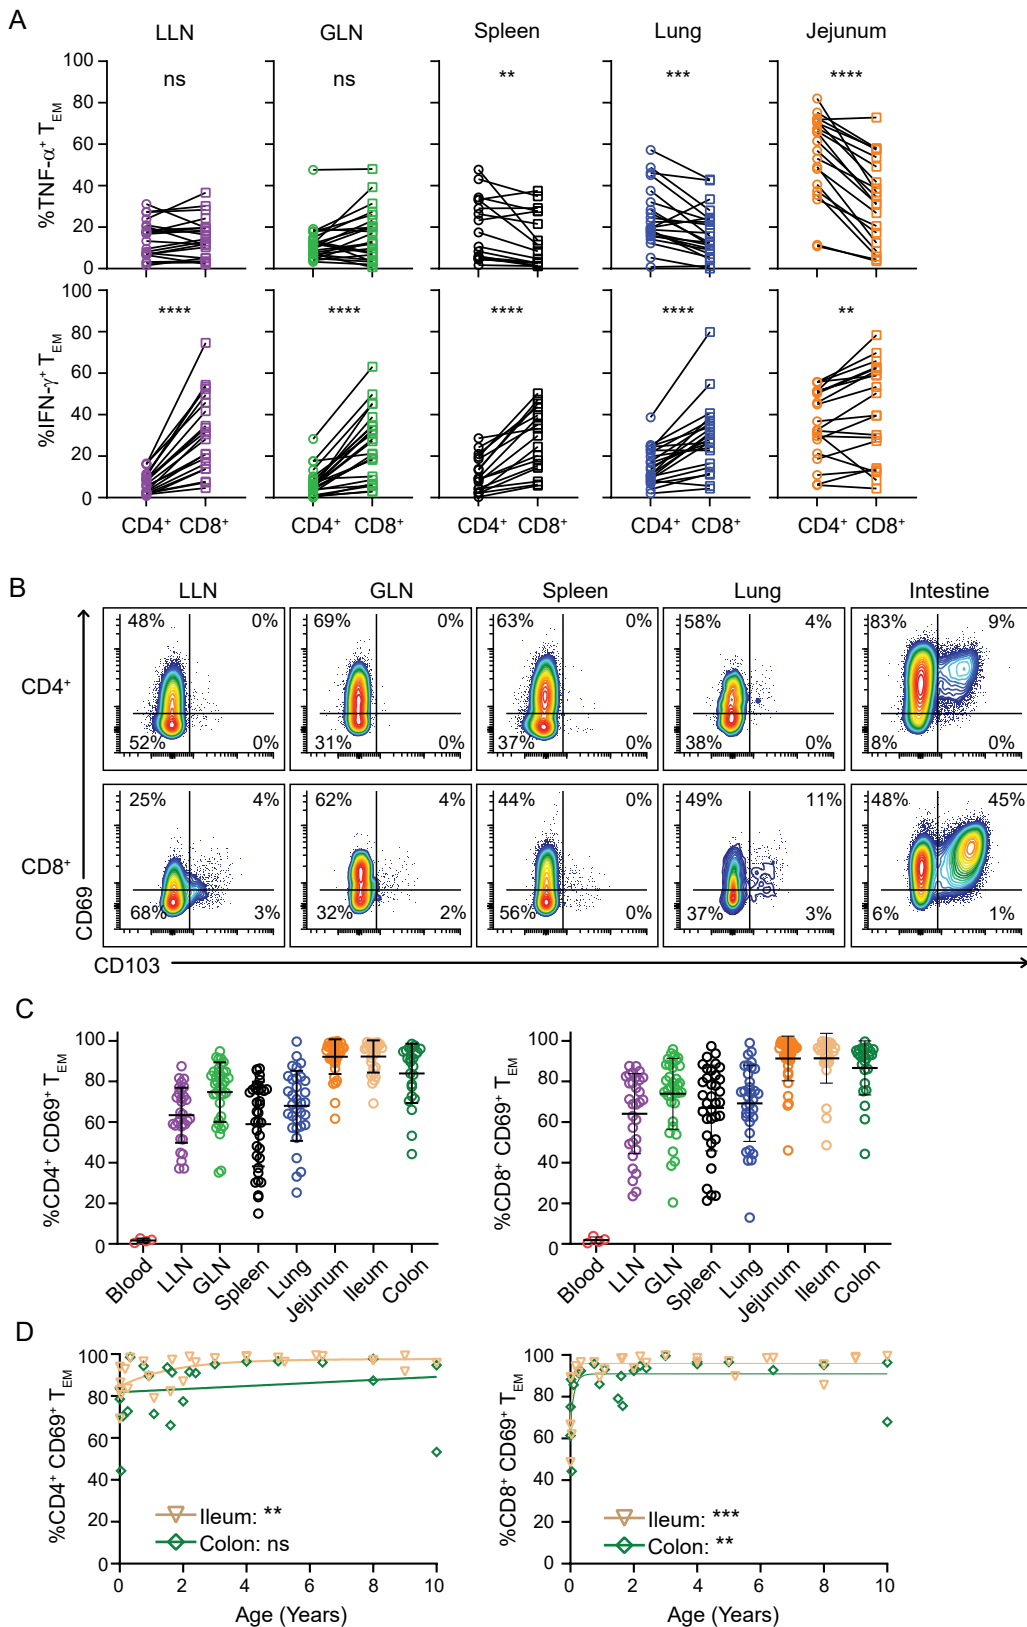

**Figure S6: Differential function and CD69 expression by memory T cells in pediatric mucosal sites and lymphoid organs. Related to Figure 3 and 4.** (A) Graphs show paired frequency of TNF- $\alpha$  (top) and IFN- $\gamma$  (bottom) production by CD4<sup>+</sup> and CD8<sup>+</sup> T<sub>EM</sub> cells in each indicated site following stimulation with PMA/ionomycin. Statistical testing by paired t-test. (B) Representative flow cytometry plots showing coordinate expression of T<sub>RM</sub> markers CD69 and CD103 by CD4<sup>+</sup> (top) and CD8<sup>+</sup> (bottom) T<sub>EM</sub> cells from indicated tissues obtained from a 9-month-old donor, showing percent of T<sub>EM</sub> cells within each quadrant. (C) Comparison of CD69 expression by CD4<sup>+</sup> (left) and CD8<sup>+</sup> (right) T<sub>EM</sub> in different tissue sites from all donors. (D) CD69 expression by CD4<sup>+</sup> (left) and CD8<sup>+</sup> (right) T<sub>EM</sub> cells in the ileum and colon over infancy and childhood. Statistical testing via Pearson correlation with best fit linear or nonlinear model depicted. Number of samples: blood, n = 0-4; LLN, n = 21-31; GLN, n = 24-36; spleen, n = 17-35; lung, n = 22-33; jejunum, n = 20-39; ileum, n = 28; colon, n = 24. ns = p>0.05, \* = p<0.05, \*\* = p<0.01, \*\*\* = p<0.001, \*\*\*\* = p<0.0001.

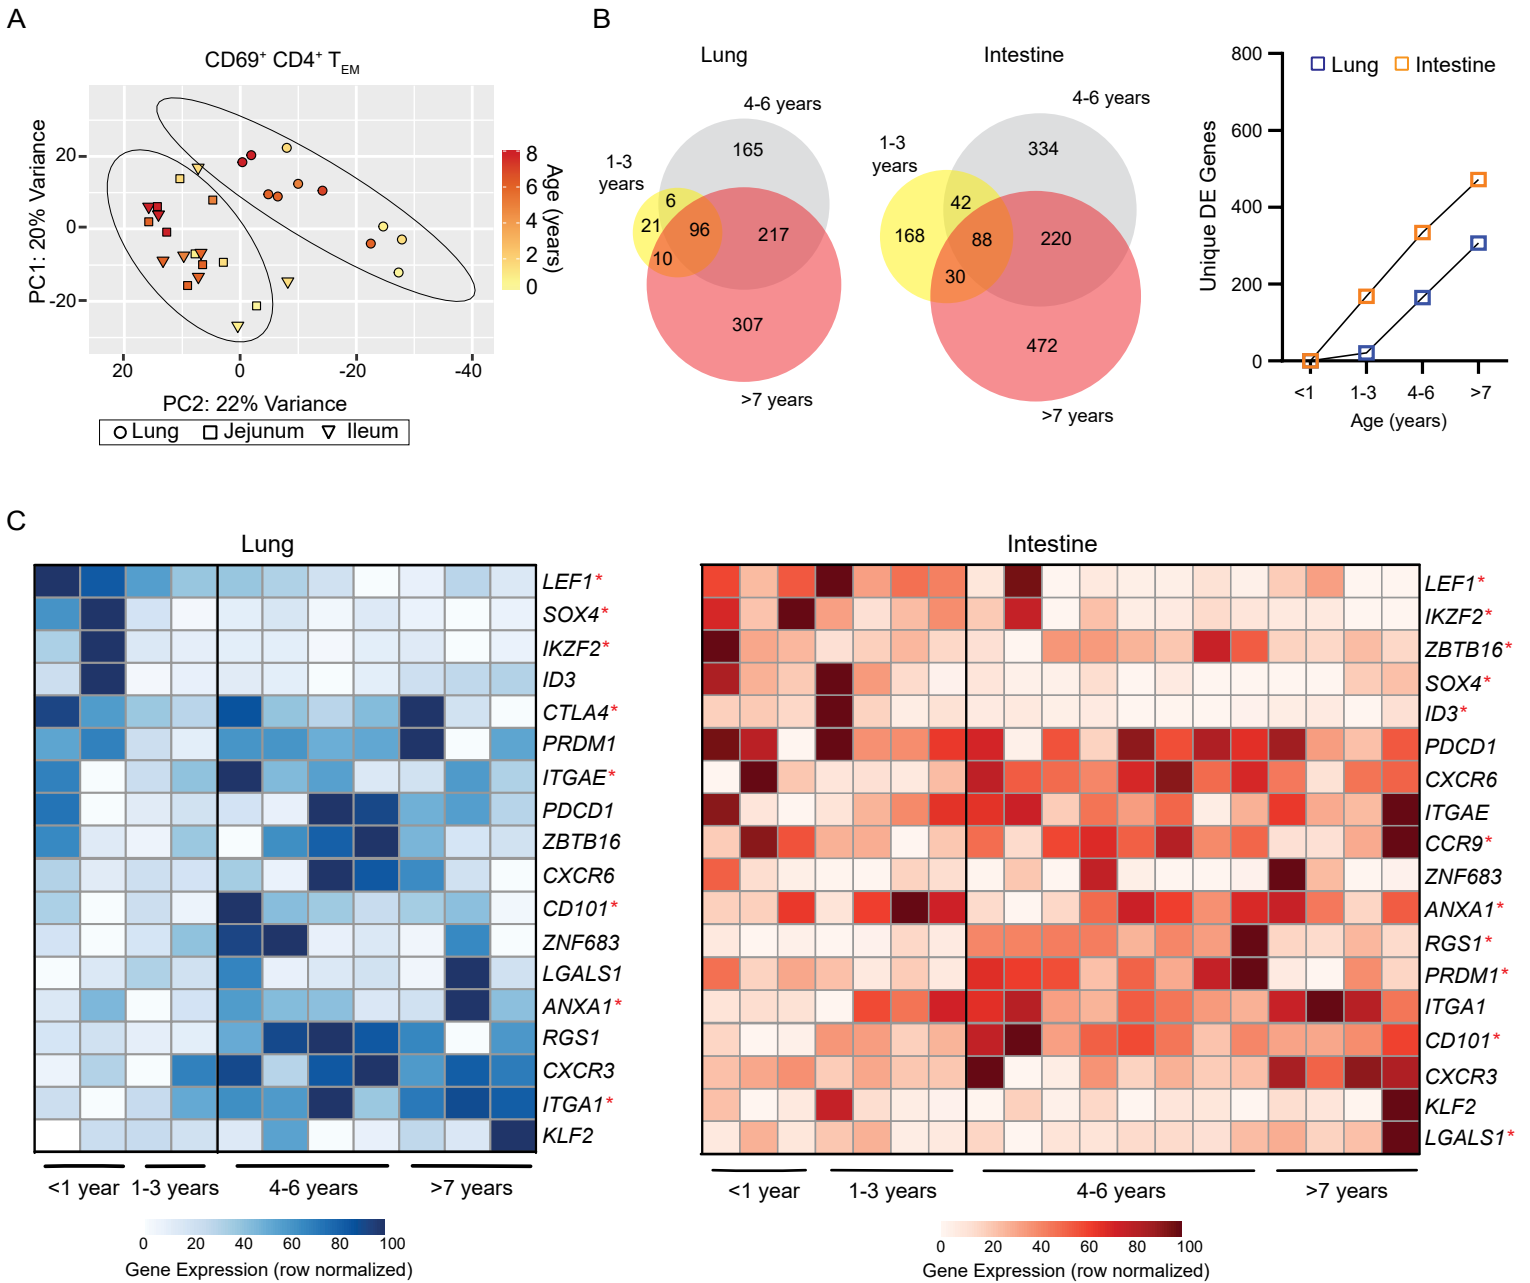

**Figure S7: Transcriptional maturation of CD4<sup>+</sup> resident memory T cells over infancy and childhood. Related to Figure 5.** CD4<sup>+</sup>CD69<sup>hi</sup> T<sub>EM</sub> cells (CD4<sup>+</sup>T<sub>RM</sub>) were sorted from the lung and intestines of infant and pediatric organ donors (n=11, aged 3 months – 8 years) for whole transcriptome profiling by population RNAseq. (A) Principal component analysis of CD4<sup>+</sup>CD69<sup>hi</sup> T<sub>EM</sub> cells from lungs (circles; n = 11) and intestine (triangles; jejunum n=10, and ileum n=9). Samples colored based on age of donor. Circles represent 1 standard deviation based on tissue site (lung or intestine). (B) Differentially expressed (DE) genes comparing older organ donors (1-3 years; n=2, 4-6 years; n=4, >7 years; n = 3) to youngest donors (<1 years; n=2). Venn diagrams (left) depicting DE genes (log<sub>2</sub>fold > ±0.5, p<0.05) within and across donor groups compared to youngest donors. Line graph depicting unique DE genes in each age group compared to youngest donor group (lungs; blue squares and intestines; orange squares). (C) Heatmaps depict row normalized gene expression of differentially expressed genes in lungs (left) and intestines (right) in donors of increasing age. Statistical testing by Spearman or Pearson correlation analysis. \* = p<0.05.

Table S1: Organ donor characteristics and tissue use, related to all Figures.

|                        | Donor ID | Age (years) | Sex              | Race/Ethnicity   | Lungs | LLN | Intestines | GLN | Spleen | Blood |
|------------------------|----------|-------------|------------------|------------------|-------|-----|------------|-----|--------|-------|
| Pediatric Organ Donors | HDL034   | 0.02        | Female           | Alaskan Native   | x     | x   | x          | x   | x      |       |
|                        | HDL035   | 2           | Male             | White            | x     | x   | x          | x   | x      |       |
|                        | HDL040   | 0.33        | Male             | White            | x     |     | x          | x   | x      |       |
|                        | HDL042   | 1.6         | Female           | African American | x     | x   | x          | x   | x      |       |
|                        | HDL043   | 2           | Male             | White            | x     | x   | I,C        | x   | x      |       |
|                        | HDL046   | 7           | Female           | White            | x     | x   |            |     | x      |       |
|                        | HDL047   | 5           | Male             | White            | x     | x   | x          | x   | x      |       |
|                        | HDL048   | 0           | Not Reported     | Unknown          |       |     | x          | x   | x      |       |
|                        | HDL049   | 0.17        | Female           | White            | x     | x   | J,I        | x   |        | x     |
|                        | HDL050   | 0.01        | Male             | White            | x     | x   | x          | x   |        |       |
|                        | HDL052   | 9           | Male             | White            | x     | x   | J,I        |     | x      |       |
|                        | HDL053   | 2           | Male             | White            | x     | x   | x          | x   | x      | x     |
|                        | HDL054   | 4           | Male             | White            |       |     | x          | x   | x      |       |
|                        | HDL055   | 0.25        | Male             | White            | x     | x   | x          | x   | x      |       |
|                        | HDL059   | 0           | Not Reported     | Unknown          | x     | x   | J,I        | x   | x      |       |
|                        | HDL060   | 3           | Male             | White            | x     | x   | x          | x   | x      |       |
|                        | HDL062   | 4           | Female           | White            | x     | x   | x          | x   | x      |       |
|                        | HDL069   | 6           | Male             | Hispanic         |       | x   | x          | x   |        |       |
|                        | HDL070   | 1.6         | Female           | White            | x     | x   | x          | x   | x      |       |
|                        | HDL071   | 6           | Male             | Hispanic         | x     | x   | x          | x   |        |       |
|                        | HDL072   | 5           | Male             | White            | x     | x   | J,I        | x   |        | x     |
|                        | HDL073   | 0.92        | Male             | White            | x     | x   | x          | x   | x      |       |
|                        | HDL074   | 6           | Male             | Native American  | x     | x   | x          | x   | x      |       |
|                        | HDL078   | 1.83        | Female           | African American | x     | x   | x          | x   | x      |       |
|                        | HDL080   | 4           | Male             | White            | x     | x   |            |     |        |       |
|                        | HDL081   | 8           | Male             | White            | x     | x   | x          | x   |        | x     |
|                        | HDL082   | 0.75        | Female           | Hispanic         | x     | x   | x          |     | x      |       |
|                        | HDL085   | 0.02        | Male             | Hispanic         | x     |     | x          |     | x      |       |
|                        | HDL086   | 1.5         | Female           | White            | x     | x   | J,C        | x   | x      |       |
|                        | HDL090   | 8           | Male             | African American |       | x   | x          | x   | x      |       |
|                        | HDL092   | 1.08        | Male             | Hispanic         | x     | x   | x          | x   | x      |       |
|                        | HDL093   | 0.58        | Female           | Hispanic         | x     | x   | J          |     | x      |       |
|                        | HDL097   | 0.1         | Female           | White            | x     | x   | C          | x   |        |       |
|                        | HDL098   | 10          | Male             | Hispanic         | x     | x   | x          |     | x      |       |
|                        | HDL099   | 4           | Male             | White            |       | x   |            | x   | x      |       |
|                        | HDL101   | 9           | Male             | Hispanic         | x     | x   |            |     |        |       |
|                        | HDL104   | 0.67        | Female           | Hispanic         | x     |     |            |     | x      |       |
|                        | HDL105   | 1.67        | Male             | African American | x     | x   |            | x   | x      |       |
|                        | HDL106   | 4           | Male             | White            | x     | x   |            | x   |        |       |
|                        | HDL110   | 0.42        | Female           | Hispanic         |       |     |            |     | x      |       |
|                        | HDL111   | 3           | Male             | African American |       |     | J          |     | x      |       |
|                        | HDL113   | 10          | Male             | Hispanic         | x     | x   | J          | x   | x      |       |
|                        | HDL115   | 2           | Female           | Unknown          |       | x   | J          | x   |        |       |
|                        | HDL116   | 6           | Female           | Hispanic         | x     | x   | J          | x   |        |       |
|                        | HDL118   | 0.17        | Male             | White            | x     |     | J          | x   | x      |       |
|                        | HDL120   | 0.03        | Male             | White            |       |     |            | x   |        |       |
|                        | HDL124   | 0.02        | Male             | White            | x     |     | J          |     | x      |       |
| HDL125                 | 4        | Male        | Hispanic         | x                |       | J   | x          | x   |        |       |
| HDL129                 | 2        | Male        | White            |                  |       | J   |            |     |        |       |
| HDL130                 | 7        | Male        | White            | x                |       | J   | x          | x   |        |       |
| HDL132                 | 6        | Female      | Hispanic         |                  |       | J   | x          | x   |        |       |
| HDL134                 | 0.33     | Female      | White            | x                |       |     |            |     |        |       |
| HDL136                 | 6        | Male        | African American |                  |       | J   | x          | x   |        |       |
| HDL137                 | 0.33     | Male        | White            |                  |       | J   | x          |     |        |       |
| HDL139                 | 6        | Male        | African American |                  |       | J   | x          | x   |        |       |
| HDL141                 | 2        | Female      | White            |                  |       |     | x          | x   |        |       |
| HDL142                 | 1.33     | Male        | White            |                  |       | J   | x          |     |        |       |
| HDL143                 | 9        | Male        | White            | x                | x     |     |            | x   |        |       |
| HDL144                 | 0.02     | Male        | Hispanic         |                  |       | J   | x          | x   |        |       |
| HDL147                 | 10       | Male        | White            | x                | x     |     |            | x   |        |       |
| HDL150                 | 7        | Male        | African American | x                | x     | J   | x          | x   |        |       |
| HDL151                 | 7        | Male        | White            | x                | x     | J   | x          |     |        |       |
| HDL155                 | 0.13     | Female      | White            |                  |       | J   | x          |     |        |       |
| LI002                  | 5        | Female      | Hispanic         |                  |       | J   | x          |     |        |       |
| LI003                  | 8        | Male        | White            |                  |       |     | x          | x   |        |       |
| nPOD6457               | 9        | Female      | White            |                  |       | J,I | x          | x   |        |       |
| D381                   | 0.17     | Male        | Hispanic         |                  |       |     |            |     | x      |       |
| D460                   | 0.58     | Female      | Unknown          | x                |       | J   |            |     |        |       |
| Adult Organ Donors     | D198     | 23          | Female           | White            |       |     | J          |     |        |       |
|                        | D314     | 35          | Female           | White            |       |     | J          |     |        |       |
|                        | D338     | 49          | Male             | Hispanic         |       |     | J          |     |        |       |
|                        | D344     | 44          | Male             | African American | x     |     |            |     |        |       |
|                        | D367     | 23          | Not Reported     | Unknown          |       |     | J          |     |        |       |
|                        | D377     | 42          | Female           | White            | x     |     |            |     |        |       |
|                        | D397     | 34          | Male             | White            | x     |     |            |     |        |       |
|                        | D427     | 69          | Male             | Hispanic         | x     |     |            |     |        |       |

1. LLN = Lung Lymph Node
2. J = Jejunum, I = Ileum, C = Colon
3. X = donors where all three intestinal sites were used
4. GLN = Gut Lymph Node



Table S2: Cell counts for RNA sequencing per donor by site and subset, related to Figures 5-7.

| Donor  | Age (years) | Lung   |        | Jejunum |        | Ileum  |        |
|--------|-------------|--------|--------|---------|--------|--------|--------|
|        |             | CD4    | CD8    | CD4     | CD8    | CD4    | CD8    |
| HDL040 | 0.33        | 60000  | 60000  | 30000   | 30000  |        | 18000  |
| HDL073 | 0.92        | 21000  | 17000  | 124000  | 35000  | 154000 | 23000  |
| HDL042 | 1.6         | 155000 | 114000 | 321000  | 350000 | 54000  | 90000  |
| HDL078 | 1.83        | 17000  | 66000  | 212000  | 55000  | 152000 | 100000 |
| HDL047 | 5           | 94000  | 92000  | 112000  | 364000 | 403000 | 445000 |
| HDL069 | 6           | 50000  | 50000  | 50000   | 50000  | 50000  | 50000  |
| HDL071 | 6           | 181000 | 157000 | 211000  | 274000 | 424000 | 417000 |
| HDL074 | 6           | 198000 | 225000 | 525000  | 484000 | 384000 |        |
| HDL046 | 7           | 45195  | 16118  |         |        |        |        |
| HDL081 | 8           | 49000  | 57000  | 487000  | 139000 | 470000 | 231000 |
| HDL090 | 8           | 38000  |        | 543000  | 881000 | 500000 | 500000 |

Table S4: Selected Gene Sets Enriched in Oldest (&gt;7 years) Compared to Youngest (&lt;1 year) Donors, related to Figure 5.

| CD8 TRM Intestine                                    | NES  | nom p-val | Exact Source |
|------------------------------------------------------|------|-----------|--------------|
| GOBP_CELL_ADHESION                                   | 1.91 | 0.000     | GO:0007155   |
| GOBP_REGULATION_OF_CELL_DIFFERENTIATION              | 1.63 | 0.000     | GO:0045595   |
| GOBP_REGULATION_OF_INTRACELLULAR_SIGNAL_TRANSDUCTION | 1.61 | 0.000     | GO:1902531   |
| GOBP_INFLAMMATORY_RESPONSE                           | 1.61 | 0.003     | GO:0006954   |
| GOBP_NEGATIVE_REGULATION_OF_DEFENSE_RESPONSE         | 1.60 | 0.013     | GO:0031348   |
| GOBP_REGULATION_OF_CELL_ADHESION                     | 1.57 | 0.014     | GO:0030155   |
| GOBP_REGULATION_INFLAMMATORY_RESPONSE                | 1.57 | 0.028     | GO:0050727   |
| GOBP_NEGATIVE_REGULATION_OF_IMMUNE_RESPONSE          | 1.51 | 0.047     | go:0050777   |
|                                                      |      |           |              |
| CD8 TRM Lung                                         | NES  | nom p-val | Exact Source |
| GOBP_LEUKOCYTE_MEDIATED_IMMUNITY                     | 1.61 | 0.012     | GO:0002443   |
| GOBP_LEUKOCYTE_CELL_CELL_ADHESION                    | 1.60 | 0.016     | GO:0007159   |
| GOBP_DEFENSE_RESPONSE                                | 1.56 | 0.003     | GO:0006952   |
| GOBP_CELL_ADHESION                                   | 1.45 | 0.017     | GO:0007155   |
| GOBP_IMMUNE_RESPONSE                                 | 1.43 | 0.014     | GO:0006955   |
|                                                      |      |           |              |
| CD4 TRM Intestine                                    | NES  | nom p-val | Exact Source |
| GOBP_CELL_ADHESION                                   | 1.88 | 0.000     | GO:0007155   |
| GOBP_REGULATION_OF_CELL_ADHESION                     | 1.72 | 0.000     | GO:0030155   |
| GOBP_REGULATION_OF_CELL_DIFFERENTIATION              | 1.69 | 0.000     | GO:0045595   |
| GOBP_INFLAMMATORY_RESPONSE                           | 1.69 | 0.000     | GO:0006954   |
|                                                      |      |           |              |
| CD4 TRM Lung                                         | NES  | nom p-val | Exact Source |
| GOBP_REGULATION_OF_IMMUNE_SYSTEM_PROCESS             | 1.70 | 0.005     | GO:0002682   |
| GOBP_IMMUNE_EFFECTOR_PROCESS                         | 1.66 | 0.022     | GO:0002252   |

Table S5: Unique clonotypes on TCR analysis per donor by tissue and subset, related to Figure 7.

| Donor  | Age (years) | LLN   |      | GLN   |      | Lung |      | Jejunum |      | Ileum |      |
|--------|-------------|-------|------|-------|------|------|------|---------|------|-------|------|
|        |             | CD4   | CD8  | CD4   | CD8  | CD4  | CD8  | CD4     | CD8  | CD4   | CD8  |
| HDL040 | 0.33        |       | 470  | 2391  | 5903 | 2272 | 2348 | 1976    | 2904 |       | 1855 |
| HDL073 | 0.92        | 7424  | 2030 | 4284  | 766  | 145  | 1785 | 7055    | 3713 | 4097  | 2507 |
| HDL042 | 1.6         | 12847 | 1666 | 7588  | 726  | 6153 | 4306 | 5904    | 3291 | 2958  | 2410 |
| HDL078 | 1.83        | 353   | 558  | 3173  | 96   | 3417 | 4832 | 8106    | 3148 | 4090  | 3359 |
| HDL047 | 5           | 13661 | 5685 | 12347 | 5277 | 7926 | 4085 | 9875    | 4784 | 5668  | 4190 |
| HDL069 | 6           | 4797  | 3320 | 3177  | 2236 | 2814 | 1002 | 2252    | 602  | 1491  | 338  |
| HDL071 | 6           | 5170  | 3319 | 4353  | 2533 | 3936 | 2511 | 3446    | 1149 | 3985  | 2521 |
| HDL074 | 6           | 2339  | 1828 | 1013  | 799  | 2477 | 1106 | 1996    | 931  | 1685  | 68   |
| HDL046 | 7           | 605   | 2168 |       |      | 3337 | 1477 |         |      |       |      |
| HDL081 | 8           | 10223 | 6760 | 15299 | 9713 | 5519 | 3176 | 7583    | 3352 | 7003  | 858  |
| HDL090 | 8           | 4549  | 1566 | 7871  | 5070 | 539  | 165  | 5573    | 1557 | 3625  | 1346 |
